# Supplementary material for: Endogenous BDNF augments NMDA receptor phosphorylation in the spinal cord via PLCγ, PKC, and PI3K/Akt pathways during colitis
Source: PubMed Central journal article supplement (PMC4545933; doi:10.1186/s12974-015-0371-z), 2015-08-20
Supplement: 12974_2015_371_MOESM1_ESM.pdf [file 12974_2015_371_MOESM1_ESM.pdf]

## Supplemental Data

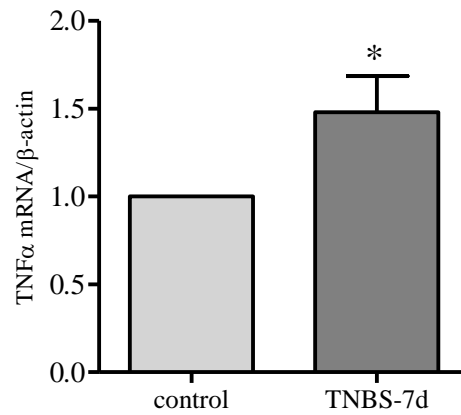

Supplemental data shows an increase in the expression level of pro-inflammatory factor tumor necrosis factor alpha in the distal colon during colitis. \*,  $p < 0.05$ .  $n = 3$ .
